# Supplementary material
Source: publisher figshare collection journal article supplement (https://tandf.figshare.com/articles/dataset/_/5732304)
Supplement: Supplementary file 1 [file 2]

## Supplementary Information

### Nest boxes for Cape Parrots *Poicephalus robustus* in the Hogsback area, Eastern Cape, South Africa

Kirsten Wimberger, Kate F Carstens, Johann C Carstens and R Stephen Boyes  
Ostrich 2018, 89(1): 79–85. DOI: 10.2989/00306525.2017.1405094

**Table S1:** Generalised Linear Models investigating factors associated with the likelihood of occupancy of nest boxes by African Honeybees (*Apis mellifera scutellata*). The models presented below are those that did not affect the likelihood of occupancy by bees.

|                   | Factor  | Est. (95% CIs)      | SE   | Z     | p    |
|-------------------|---------|---------------------|------|-------|------|
| <b>Model 1</b>    |         |                     |      |       |      |
| (Intercept)       |         | -0.25 (-0.57, 0.07) | 0.16 | -1.52 | 0.13 |
| Nest type         | Bee box | 0.13 (-0.90, 1.14)  | 0.51 | 0.25  | 0.80 |
| <b>Model 2</b>    |         |                     |      |       |      |
| (Intercept)       |         | -0.33 (-0.69, 0.02) | 0.18 | -1.79 | 0.07 |
| Nest box material | Pine    | 0.33 (-0.34, 1.00)  | 0.34 | 0.95  | 0.34 |
| <b>Model 3</b>    |         |                     |      |       |      |
| (Intercept)       |         | -0.73 (-1.66, 0.17) | 0.47 | -1.56 | 0.12 |
| Nest height       |         | 0.04 (-0.02, 0.10)  | 0.03 | 1.12  | 0.26 |
| <b>Model 4</b>    |         |                     |      |       |      |
| (Intercept)       |         | -0.31 (-1.11, 0.46) | 0.40 | -0.78 | 0.44 |
| Orientation       | South   | 0.22 (-0.68, 1.15)  | 0.46 | 0.48  | 0.63 |
|                   | East    | 0.62 (-0.47, 1.74)  | 0.56 | 1.11  | 0.27 |
|                   | West    | -0.38 (-1.36, 0.60) | 0.50 | -0.77 | 0.44 |

**Table S2:** Generalised Linear Models investigating factors associated with the likelihood of occupancy of nest boxes by birds. The models presented below are those that did not affect the likelihood of occupancy by birds. Models investigating the effect of tree species and orientation on occupancy are not presented, as the estimates and confidence intervals could not be computed without errors.

| Factor                |                | Est. (95% CIs)     | SE   | Z    | p     |
|-----------------------|----------------|--------------------|------|------|-------|
| <b>Model 1</b>        |                |                    |      |      |       |
| (Intercept)           |                | 3.16 (2.37, 4.20)  | 0.46 | 6.92 | <0.01 |
| Location              | Natural forest | 0.71 (-1.15, 3.68) | 1.11 | 0.64 | 0.52  |
| <b>Model 2</b>        |                |                    |      |      |       |
| (Intercept)           |                | 3.17 (2.38, 4.20)  | 0.46 | 6.94 | <0.01 |
| Nest box material     | Pine           | 0.68 (-1.18, 3.65) | 1.12 | 0.61 | 0.54  |
| <b>Model 3</b>        |                |                    |      |      |       |
| (Intercept)           |                | 2.35 (-1.66, 0.18) | 1.14 | 2.06 | 0.04  |
| Nest height           |                | 0.08 (-0.03, 0.10) | 0.09 | 0.86 | 0.40  |
| <b>Model 4</b>        |                |                    |      |      |       |
| (Intercept)           |                | 2.20 (0.95, 4.04)  | 0.75 | 2.95 | <0.01 |
| Bee box present below |                | 1.41 (-0.61, 3.12) | 0.90 | 1.57 | 0.12  |
